# Supplementary material for: Discovering lncRNA mediated sponge interactions in breast cancer molecular subtypes
Source: PubMed Central journal article supplement (PMC6122485; doi:10.1186/s12864-018-5006-1), 2018-09-04
Supplement: 12864_2018_5006_MOESM1_ESM.pdf [file 12864_2018_5006_MOESM1_ESM.pdf]

# Supplementary Materials for ‘Discovering lncRNA Mediated Sponge Interactions in Breast Cancer Molecular Subtypes’

Gulden Olgun<sup>1</sup>, Ozgur Sahin<sup>2</sup>, Oznur Tastan<sup>3\*</sup>

<sup>1</sup> Department of Computer Engineering, Bilkent University, Ankara, Turkey

<sup>2</sup> Department of Molecular Biology and Genetics, Faculty of Science, Bilkent University, Ankara, Turkey

<sup>3</sup> Faculty of Engineering and Natural Sciences, Sabanci University, Tuzla, Istanbul, Turkey

\* otastan@sabanciuniv.edu

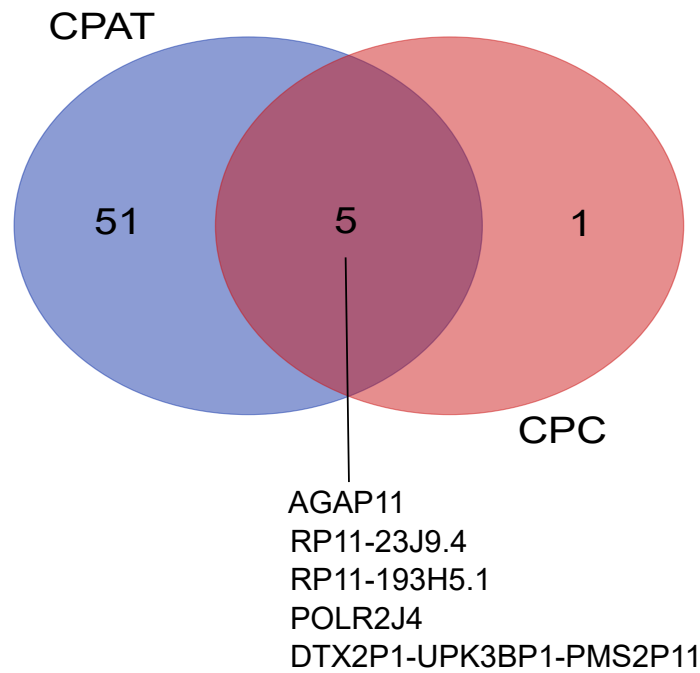

Figure S1: Venn diagrams for lncRNAs that are found coding with CPAT [1] and/or CPC [2].

Table S1: Number of patients in each breast cancer subtype.

| Subtypes  | # of Patients   |               |
|-----------|-----------------|---------------|
|           | Expression Data | Clinical Data |
| Luminal A | 211             | 207           |
| Luminal B | 112             | 110           |
| Basal     | 85              | 83            |
| HER2      | 54              | 50            |

Table S2: Pathway data sources utilized for enrichment analysis and number of pathways in each data source.

| Source                            | # of Pathways | Version/Frozen Date |
|-----------------------------------|---------------|---------------------|
| HumanCyc                          | 240           | v20.5               |
| Institute of Bioinformatics (IOB) | 33            | July 2011           |
| MSigdb                            | 520           | v5.1                |
| NCI                               | 223           | Feb 2016            |
| NetPath                           | 25            | Jun 2016            |
| Panther                           | 175           | Jul 2016            |
| Reactome                          | 18889         | Dec 2016            |

Table S3: Number of ceRNA interactions identified in each breast cancer subtypes at  $t = 0.3$  and  $t = 0.2$ . Total number of all ceRNA interactions and number of subtype specific ceRNAs are provided.

| Subtypes  | # of ceRNA Interaction |                  |               |                  |
|-----------|------------------------|------------------|---------------|------------------|
|           | 0.3 Threshold          |                  | 0.2 Threshold |                  |
|           | Found All              | Subtype Specific | Found All     | Subtype Specific |
| Luminal A | 57                     | 22               | 1719          | 98               |
| Luminal B | 124                    | 51               | 2657          | 595              |
| Basal     | 1479                   | 1309             | 8646          | 5615             |
| HER2      | 535                    | 371              | 4247          | 1514             |

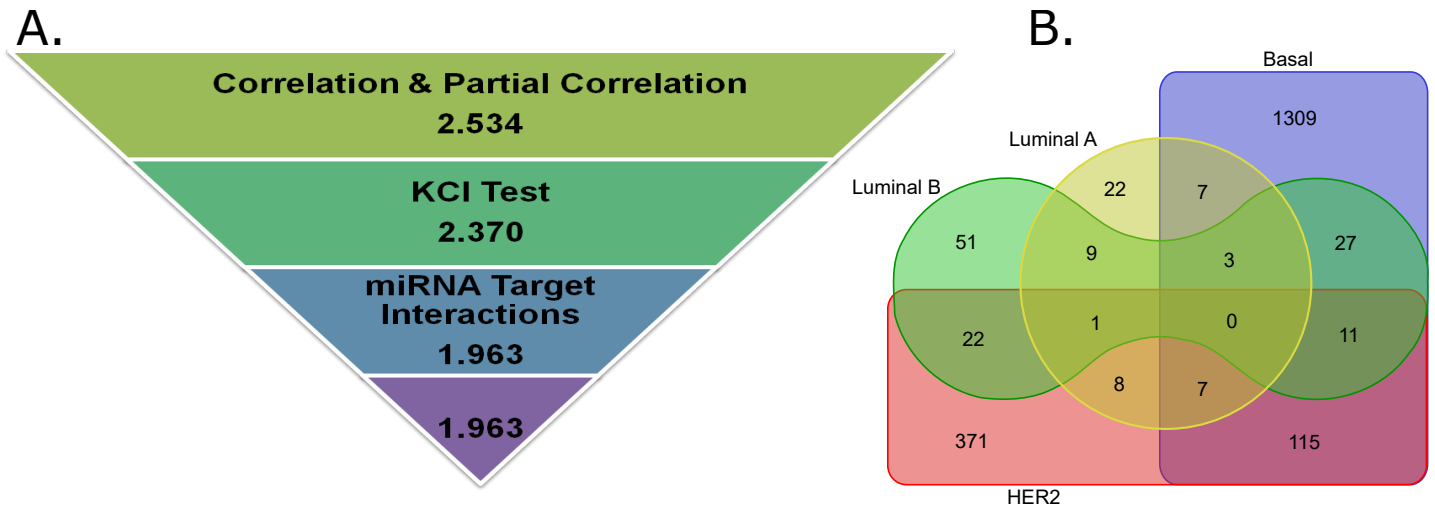

Figure S2: A) Number of ceRNAs remained after each main filtering step when  $t = 0.3$  threshold is used. B) Venn diagram of ceRNA interactions discovered in each of the breast cancer molecular subtype.

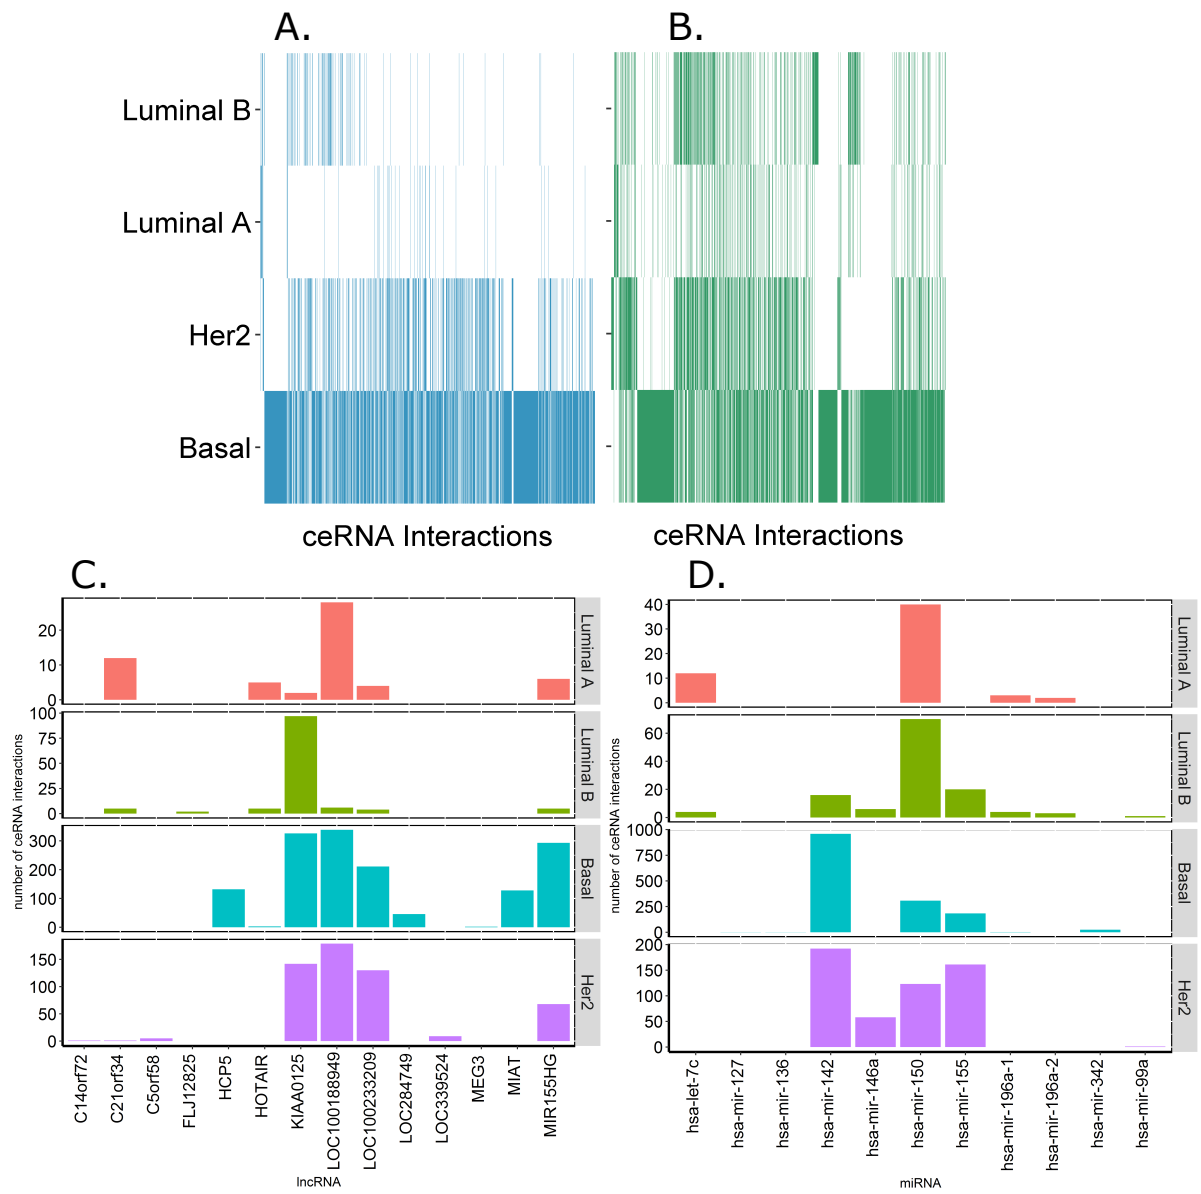

Figure S3: A-B) Heatmaps display the distribution of ceRNAs over the subtypes for A)  $t = 0.3$  and B)  $t = 0.2$ . Blue and green cells indicate the ceRNA interaction is discovered in the given subtype, while white color indicates it is not. Number of ceRNA interactions discovered that per C) each lncRNA and per B) each miRNA in each breast cancer subtypes ( $t = 0.3$ ).

Table S4: List of lncRNAs & miRNAs that are found in sponges of single subtype.

| Subtype   | miRNA                                                                                                                                                                                                                                                                                                                                   | lncRNA                                                                                      |
|-----------|-----------------------------------------------------------------------------------------------------------------------------------------------------------------------------------------------------------------------------------------------------------------------------------------------------------------------------------------|---------------------------------------------------------------------------------------------|
| Luminal A | hsa-miR-381                                                                                                                                                                                                                                                                                                                             |                                                                                             |
| Luminal B | hsa-miR-431<br>hsa-miR-758<br>hsa-miR-708<br>hsa-miR-214<br>hsa-miR-370                                                                                                                                                                                                                                                                 |                                                                                             |
| HER2      | hsa-miR-29b-1<br>hsa-miR-140<br>hsa-miR-149<br>hsa-miR-23b<br>hsa-miR-9-1<br>hsa-miR-379<br>hsa-miR-675<br>hsa-miR-101-1<br>hsa-miR-502<br>hsa-miR-30b<br>hsa-miR-223<br>hsa-miR-34a<br>hsa-miR-26a-2<br>hsa-miR-9-2<br>hsa-miR-511-1<br>hsa-miR-1270-1<br>hsa-miR-148a<br>hsa-miR-146b<br>hsa-miR-18a<br>hsa-miR-29b-2<br>hsa-miR-301a | FLJ37453<br>MIR17HG<br>C17orf44<br>LOC254559<br>C8orf51<br>PP14571<br>H19<br>SNHG3<br>HESRG |
| Basal     | hsa-miR-10b<br>hsa-miR-1245<br>hsa-miR-493<br>hsa-miR-342<br>hsa-miR-17<br>hsa-miR-20a<br>hsa-miR-577<br>hsa-miR-337<br>hsa-miR-3614<br>hsa-miR-200c                                                                                                                                                                                    | LOC284749<br>C17orf91<br>LOC388692<br>KIAA1529<br>LOC678655                                 |

### A. Luminal A

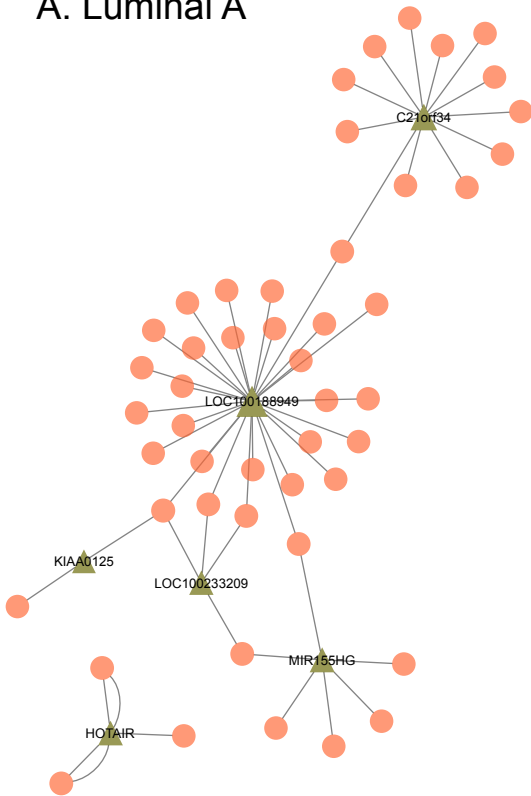

### B. HER2

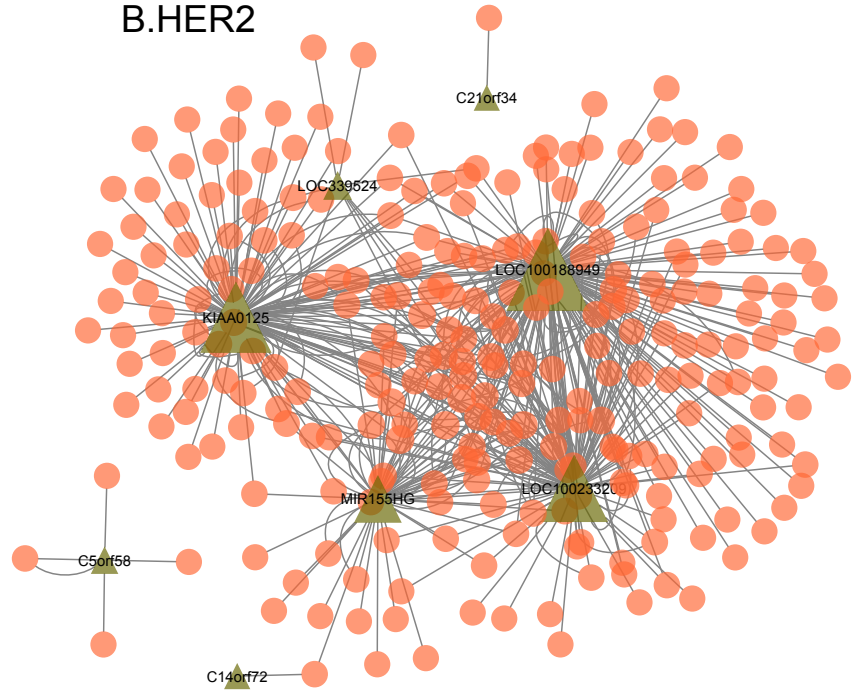

### C. Basal

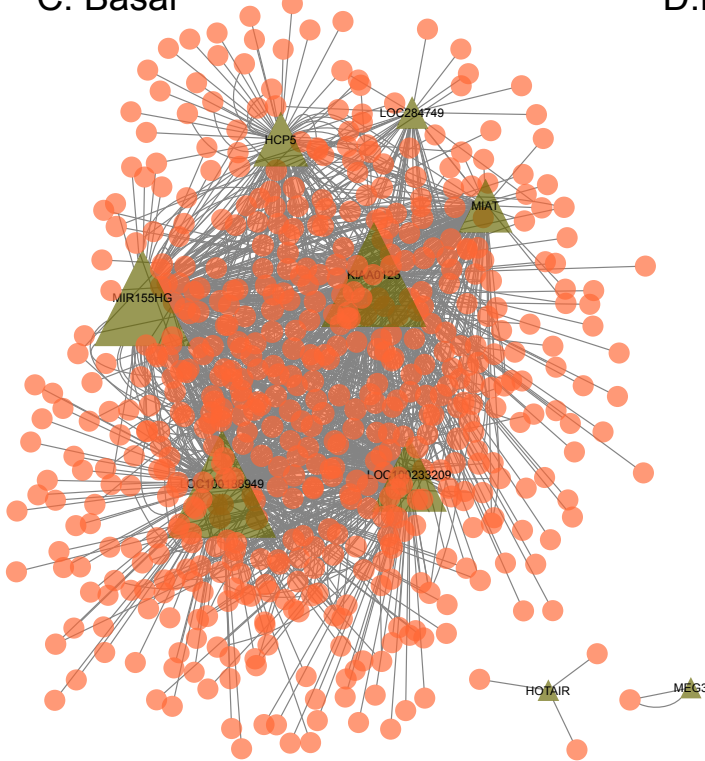

### D. Luminal B

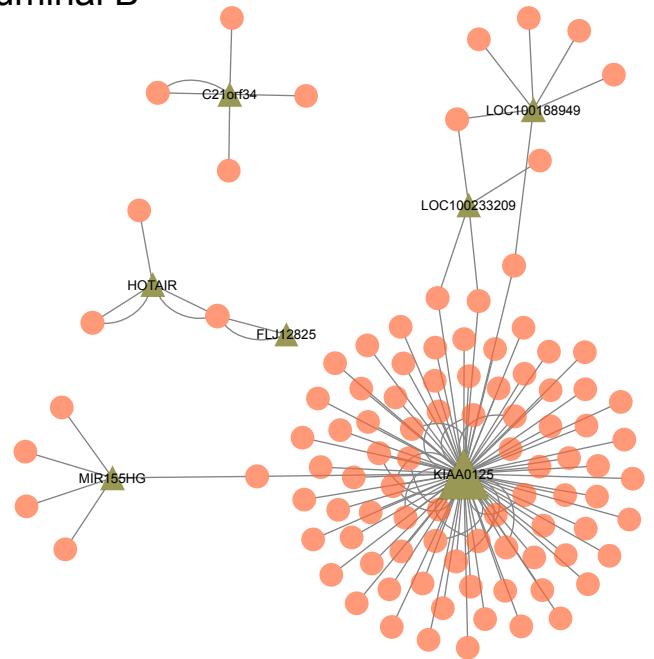

Figure S4: lncRNA-mRNA network for each breast cancer subtypes. Green triangle nodes represent lncRNA and circle orange nodes represents mRNA. An edge between an mRNA and a lncRNA is drawn to represent a ceRNA interaction through a miRNA. Node size is in proportion to degree of the node. The network plot was generated with Cytoscape(v3.4.0)[3].

Table S5: Number nodes and edges for bipartite lncRNA-mRNA networks for each breast cancer subtypes where each node denotes lncRNA or mRNA and each edge represents a lncRNA-mRNA interaction,miRNA.

| Subtypes  | # of Nodes | # of Edges |
|-----------|------------|------------|
| Luminal A | 54         | 57         |
| Luminal B | 106        | 124        |
| Basal     | 574        | 1479       |
| HER2      | 272        | 535        |

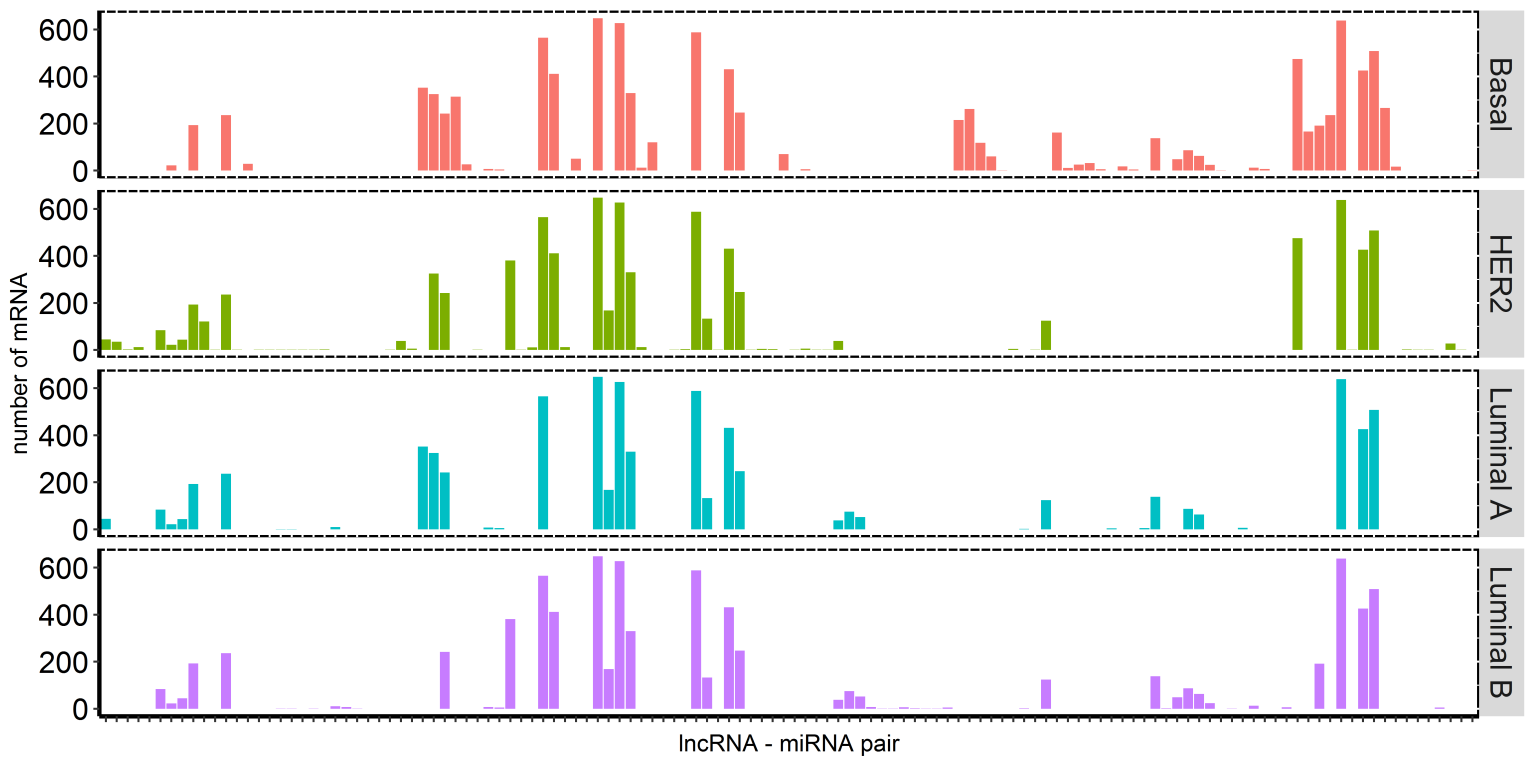

Figure S5: Number of mRNAs that each lncRNA-miRNA pair interacts with in each subtype ( $t = 0.2$ ).

Table S6: Number of unique lncRNA - miRNA

| Subtypes  | # of lncRNA-miRNA pair |
|-----------|------------------------|
| Luminal A | 37                     |
| Luminal B | 52                     |
| HER2      | 64                     |
| Basal     | 60                     |

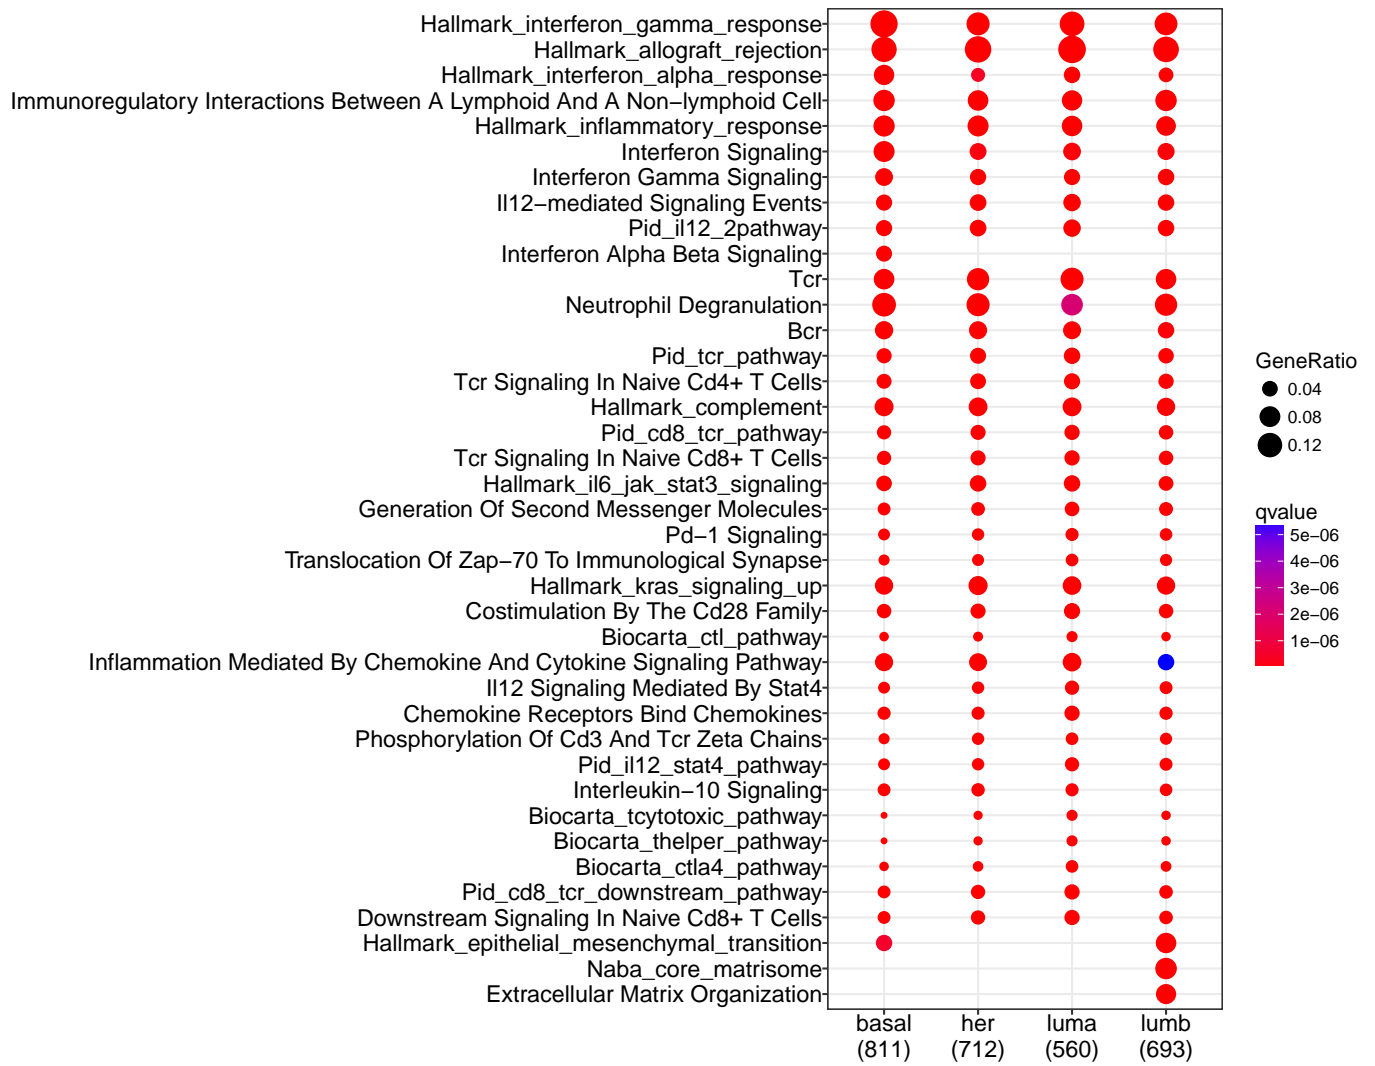

Figure S6: The dot plot for the most significant 27 enriched pathway which were filtered out by  $p$ -value cutoff 0.05 and FDR cutoff  $1 \times 10^{-4}$ . Dots in the plot are color coded depending upon the relevant FDR value. Color gradient changes from red(low FDR value, high enrichment) to blue(high FDR value, low enrichment). Dot size depends on the gene ratio, ratio of enriched genes to identified genes in the pathway. Number of identified genes in each subtypes were provided in parenthesis.

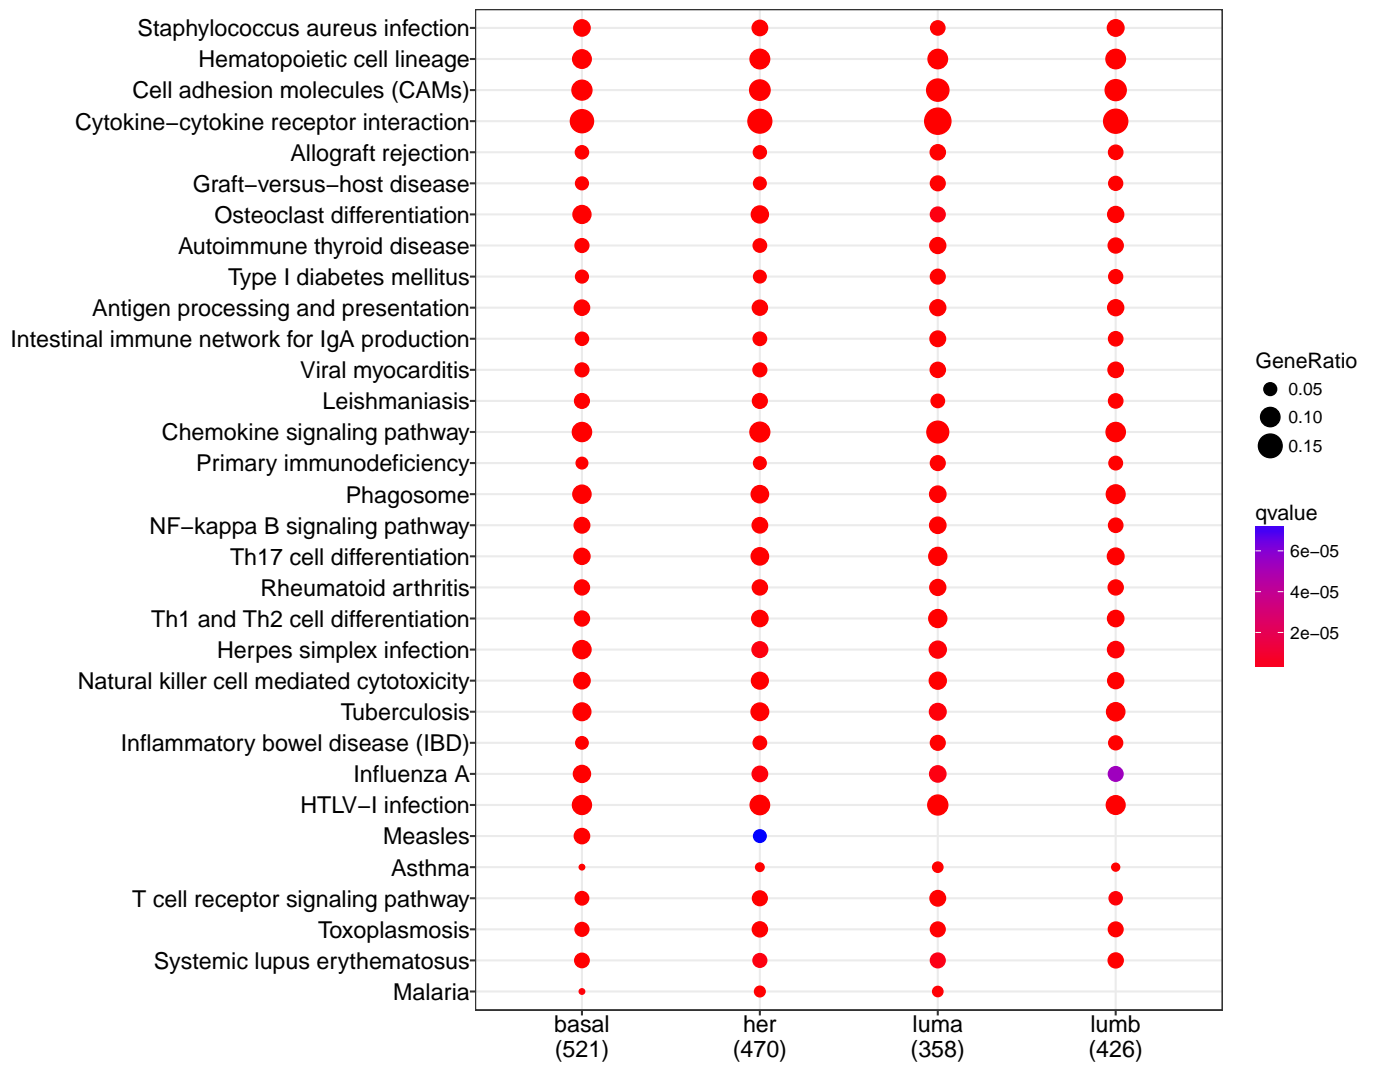

Figure S7: The dot plot for the most significant 27 enriched KEGG pathway which were filtered out by  $p$ -value cutoff 0.05 and FDR cutoff  $1 \times 10^{-4}$ . Dots in the plot are color coded depending upon the relevant FDR value. Color gradient changes from red (low FDR value, high enrichment) to blue (high FDR value, low enrichment). Dot size depends on the gene ratio, ratio of enriched genes to identified genes in the pathway. Number of identified genes in each subtypes were provided in parenthesis.

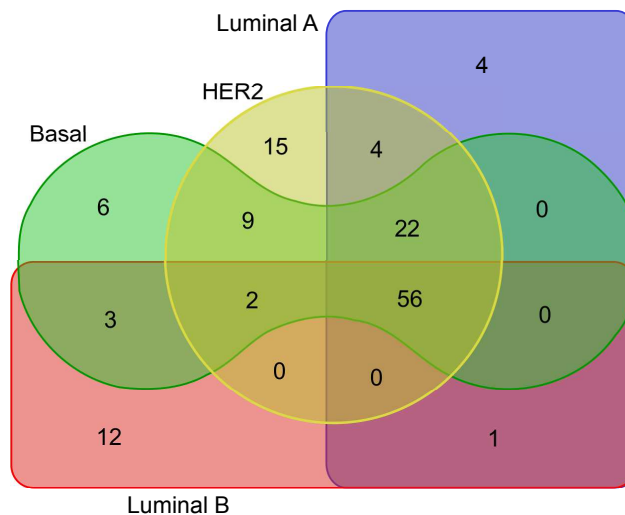

Figure S8: Venn diagram displaying the distribution of enriched pathways ( $p$ -value  $\leq 0.05$  and FDR  $\leq 1 \times 10^{-4}$ .) over the subtypes.



Table S7: List of subtype specific enriched pathways. Bonferroni corrected p values are provided and all listed pathways are above FDR cutoff  $1 \times 10^{-4}$ .

| Subtypes                                               | List of Subtype Specific Pathways                                            | p-value                |
|--------------------------------------------------------|------------------------------------------------------------------------------|------------------------|
| Luminal A                                              | • Constitutive Signaling By Aberrant Pi3K In Cancer                          | $2.84 \times 10^{-6}$  |
|                                                        | • Biocarta il17 Pathway                                                      | $5.22 \times 10^{-6}$  |
|                                                        | • Pid il2 1 Pathway                                                          | $5.33 \times 10^{-6}$  |
|                                                        | • Pid TxA2 Pathway                                                           | $7.90 \times 10^{-6}$  |
| Luminal B                                              | • Naba Core Matrisome                                                        | $3.58 \times 10^{-20}$ |
|                                                        | • Extracellular Matrix Organization                                          | $2.30 \times 10^{-13}$ |
|                                                        | • ECM Glycoproteins                                                          | $2.66 \times 10^{-10}$ |
|                                                        | • Naba Proteoglycans                                                         | $2.51 \times 10^{-8}$  |
|                                                        | • Formation                                                                  | $6.86 \times 10^{-8}$  |
|                                                        | • Collagen Biosynthesis And Modifying Enzymes                                | $1.19 \times 10^{-7}$  |
|                                                        | • Integrin Signalling Pathway                                                | $5.37 \times 10^{-7}$  |
|                                                        | • Assembly Of Collagen Fibrils And Other Multimeric Structures               | $1.89 \times 10^{-6}$  |
|                                                        | • Pid Integrin1 Pathway                                                      | $2.99 \times 10^{-6}$  |
|                                                        | • $\beta 1$ Integrin Cell Surface Interactions                               | $2.99 \times 10^{-6}$  |
| • Pid $\alpha v \beta 3$ Integrin Pathway              | $3.42 \times 10^{-6}$                                                        |                        |
| • Pid Syndecan 1 Pathway                               | $6.38 \times 10^{-6}$                                                        |                        |
| Basal                                                  | • Interferon Alpha Beta Signaling                                            | $7.20 \times 10^{-23}$ |
|                                                        | • Antigen Presentation: Folding, Assembly And Peptide Loading Of Class I MHC | $1.05 \times 10^{-9}$  |
|                                                        | • ER-phagosome Pathway                                                       | $2.52 \times 10^{-8}$  |
|                                                        | • BCR Signaling Pathway                                                      | $2.84 \times 10^{-8}$  |
|                                                        | • Biocarta Complement Pathway                                                | $8.14 \times 10^{-8}$  |
|                                                        | • Pertussis                                                                  | $1.17 \times 10^{-6}$  |
| • Complement Cascade                                   | $7.16 \times 10^{-6}$                                                        |                        |
| HER2                                                   | • Integrin Cell Surface Interactions                                         | $3.68 \times 10^{-9}$  |
|                                                        | • SA MMP Cytokine Connection                                                 | $2.62 \times 10^{-8}$  |
|                                                        | • Pid $\alpha m \beta 2$ Neutrophils Pathway                                 | $2.98 \times 10^{-7}$  |
|                                                        | • Class I Pi3k Signaling Events                                              | $7.47 \times 10^{-7}$  |
|                                                        | • Il27-Mediated Signaling Events                                             | $9.33 \times 10^{-7}$  |
|                                                        | • Signaling Events Mediated By Stem Cell Factor Receptor (c-kit)             | $9.86 \times 10^{-7}$  |
|                                                        | • Calcineurin-Regulated Nfat-Dependent Transcription In Lymphocytes          | $2.24 \times 10^{-6}$  |
|                                                        | • CCR1                                                                       | $4.27 \times 10^{-6}$  |
|                                                        | • Pid GMCSF Pathway                                                          | $5.01 \times 10^{-6}$  |
|                                                        | • DAP12 Interactions                                                         | $7.27 \times 10^{-6}$  |
|                                                        | • $\alpha m \beta 2$ Integrin Signaling                                      | $8.24 \times 10^{-6}$  |
| • JAK/STAT Signaling Pathway                           | $9.25 \times 10^{-6}$                                                        |                        |
| • AGE-RAGE Signaling Pathway in Diabetic Complications | $1.64 \times 10^{-5}$                                                        |                        |

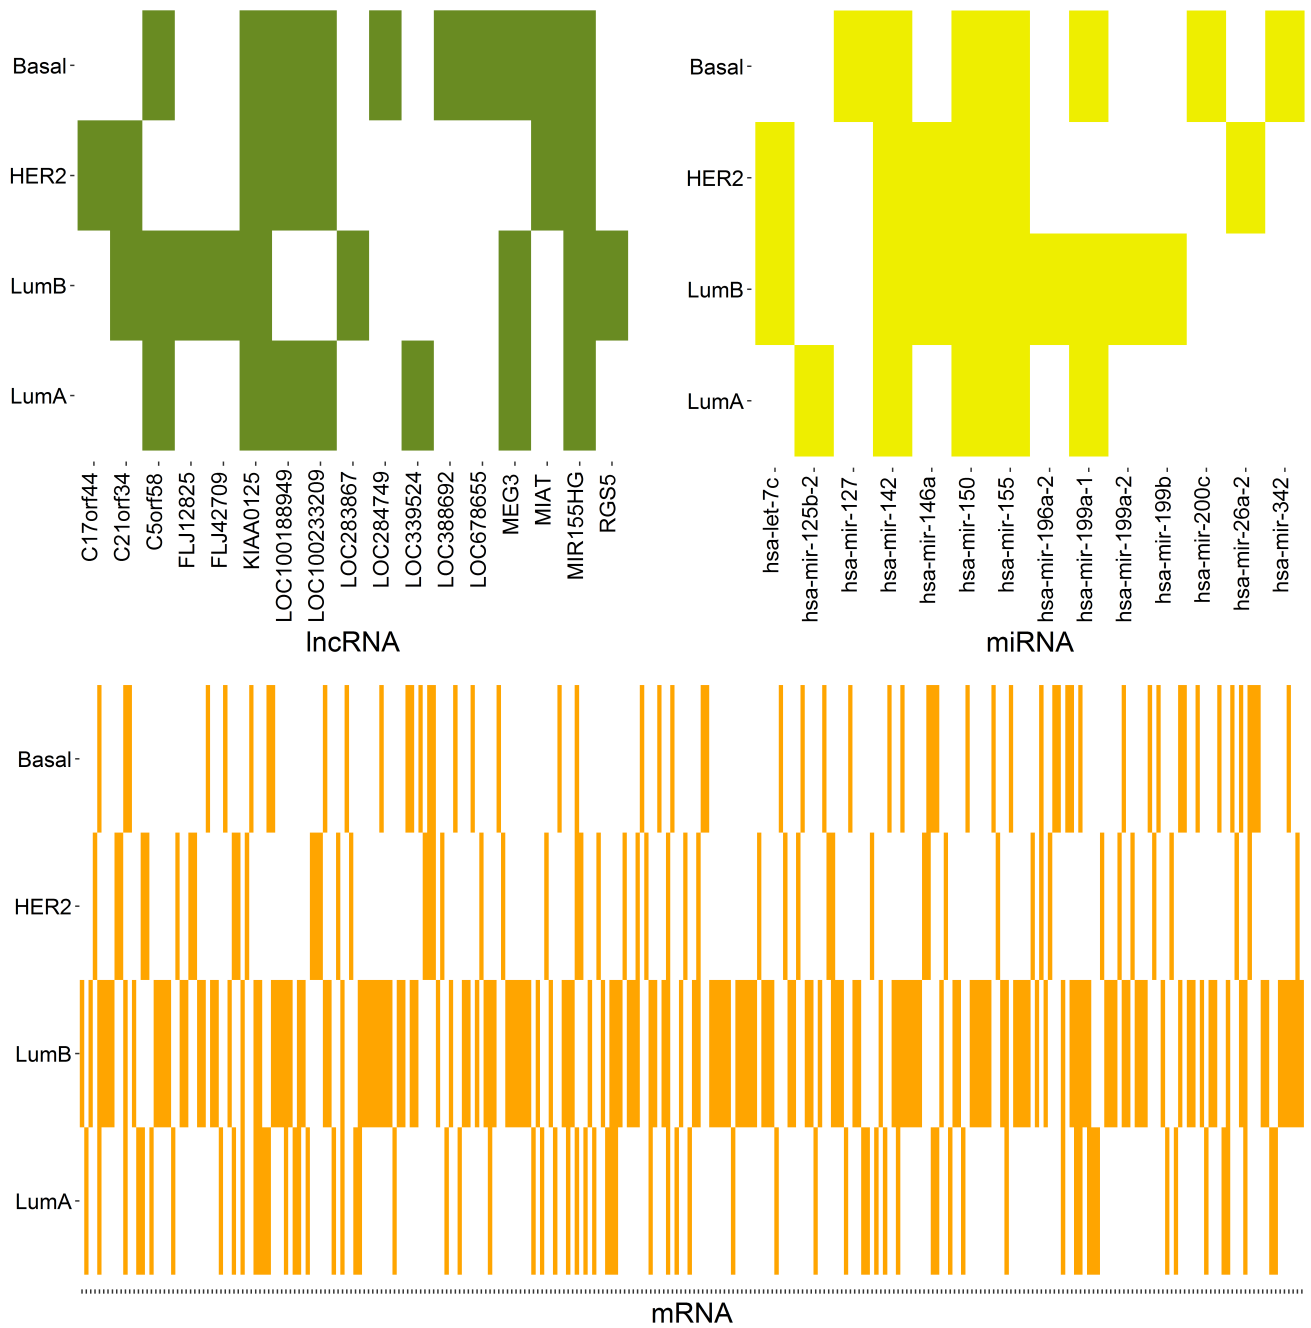

Figure S9: **Distribution of the prognostic RNAs in breast cancer subtypes** Colored cells indicate the RNA is discovered in the given subtype, while white color indicates it is not. To keep the figure simpler and easier to read, list of prognostic mRNAs provided in Supp. File 3.

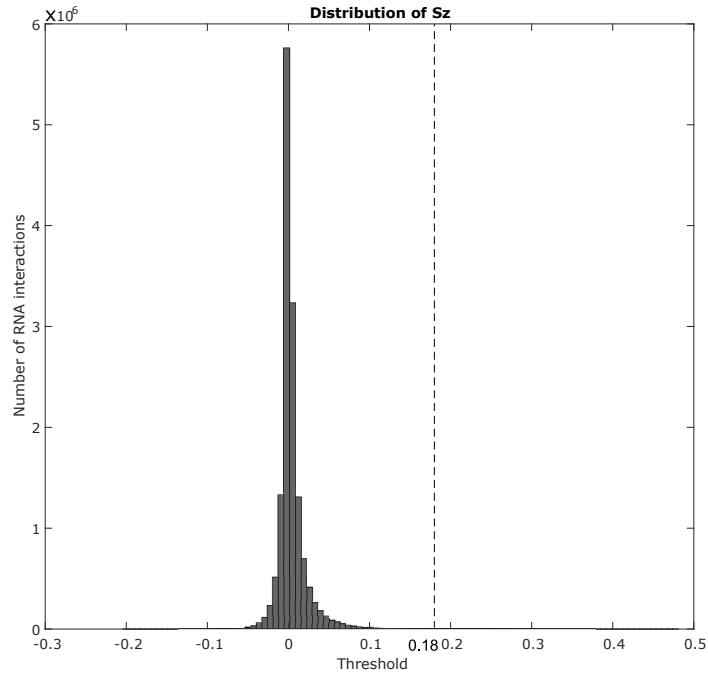

Figure S10: The distribution of the  $S_z$  values for all tested RNA triplets. 99<sup>th</sup> percentile is illustrated with a red dashed line.

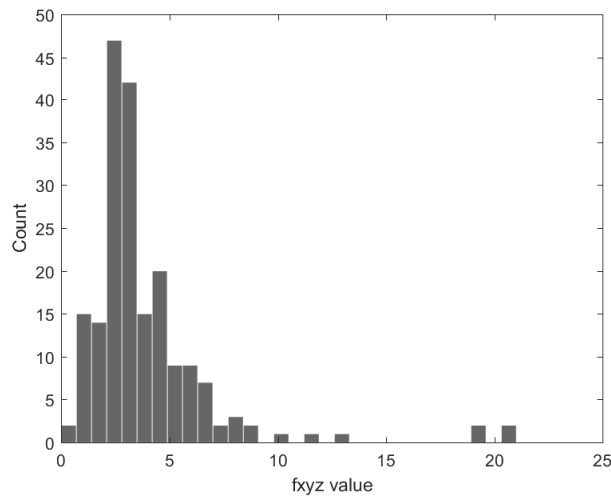

Figure S11: The distribution of the  $f_{xyz}$  scores of the prognostic ceRNA interactions.

## References

- [1] Wang L, Park HJ, Dasari S, Wang S, Kocher JP, Li W. CPAT: Coding-Potential Assessment Tool using an alignment-free logistic regression model. Nucl. Acids Res., 2013; 41(6): e74.
- [2] Kong L, Zhang Y, Ye Z, Liu X, Zhao S, Wei L, Gao G. CPC: assess the protein-coding potential of transcripts using sequence features and support vector machines. Nucl. Acids Res. 2007;35, suppl 2 :W345-W349.
- [3] Shannon P, Markiel A, Ozier O, Baliga NS, Wang JT, Ramage D, Amin N, Schwikowski B, Ideker T. Cytoscape: a software environment for integrated models of biomolecular interaction networks Genome Research 2003 Nov; 13(11):2498-504
